# Supplementary material for: Spontaneous formation of branched nanochains from room temperature molten amides: visible and near-IR active, SERS substrates for non-fluorescent and fluorescent analytes
Source: Royal Society of Chemistry journal article supplement (doi:10.1039/c3ra23378b), 2013-01-01

## Supporting Information

# **Spontaneous Formation of Branched Nanochains From Room Temperature Molten Amides: Visible and Near – IR Active, SERS Substrates for Non-Fluorescent and Fluorescent Analytes**

K. L. Nagashree, R. Lavanya, C. Kavitha, N. S. Venkata Narayanan, and

Srinivasan Sampath\*

Department of Inorganic and Physical Chemistry

Indian Institute of Science, Bangalore 560 012, India

\*E-mail address: [sampath@ipc.iisc.ernet.in](mailto:sampath@ipc.iisc.ernet.in)

Tel.: +91 80 22933315; Fax: +91 80 23601552

**Figure S1.** Schematic of preparation of SERS substrate.

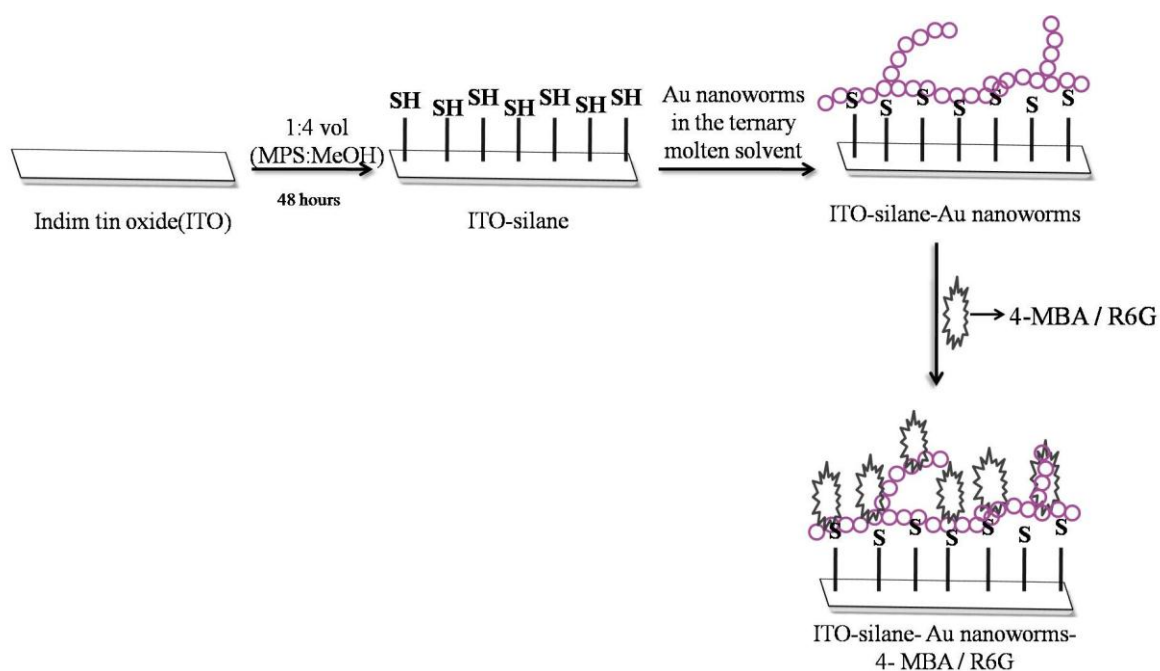

**Figure S2.** SEM of gold nanoworms separated, and re-dispersed in ethanol.

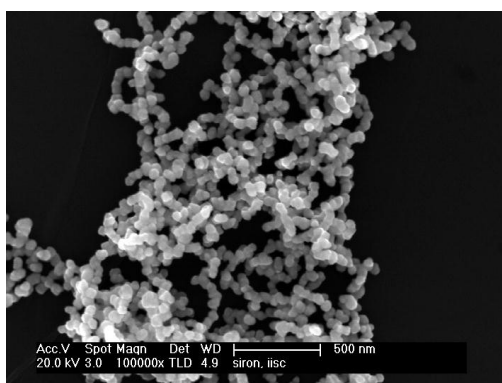

**Figure S3.** EDX spectrum of gold nanoparticles.

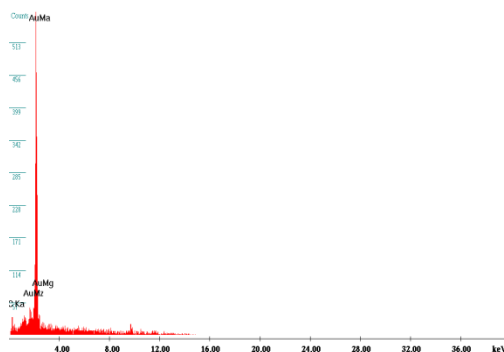

**Figure S4.** XRD pattern for gold nanoparticles.

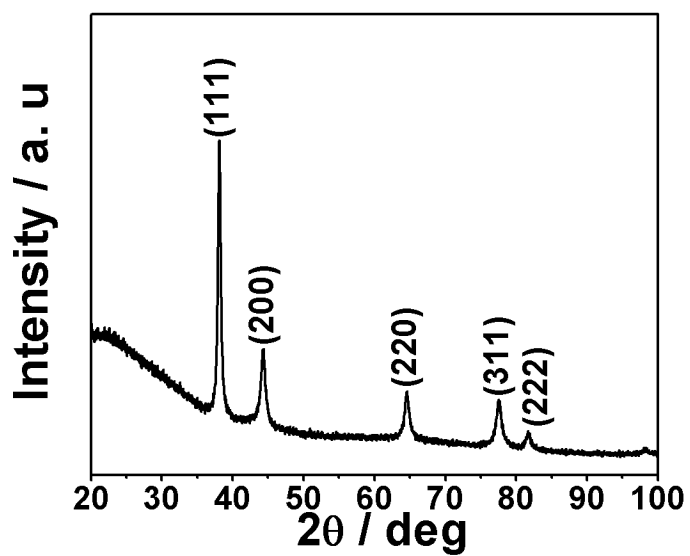

**Figure S5.** Absorbance spectra for Au colloid in the ternary molten solvent.

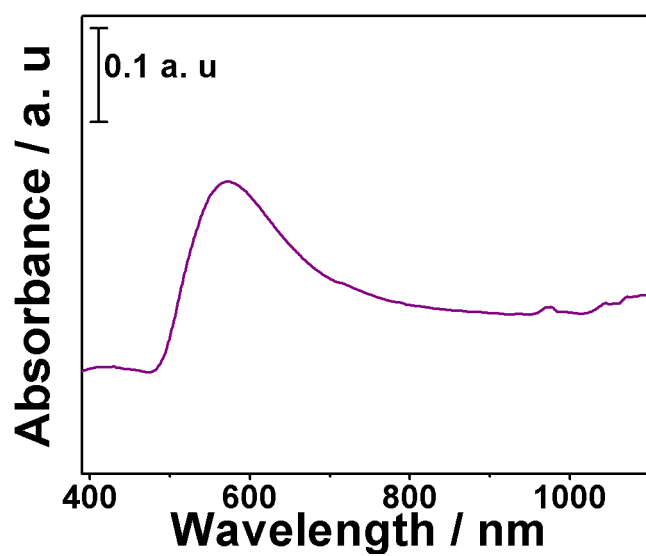

**Figure S6.** SERS spectrum for 4-MBA adsorbed on Au nanoworms in full spectral range.

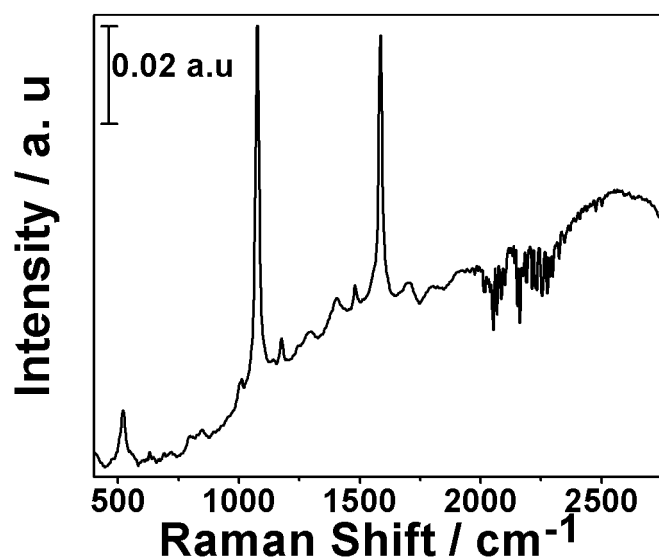

**Figure S7.** DFT calculated spectra for 4-MBA adsorbed on gold surface at different orientation angles (a) 30 ° (b) 70 ° and (c) 80 °.

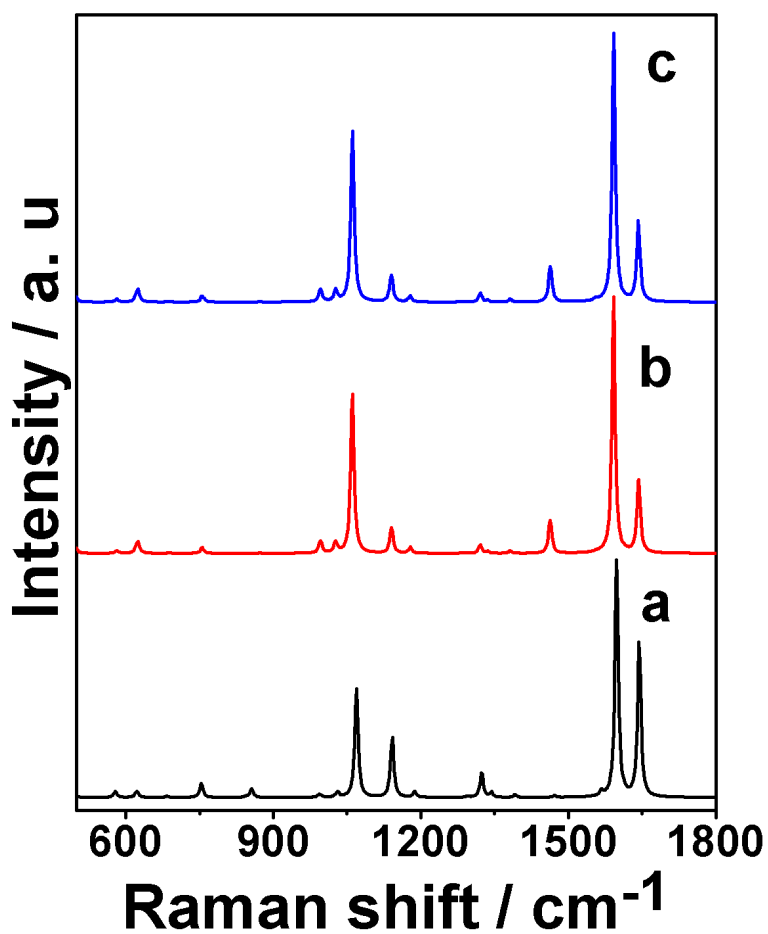

**Figure S8.** SERS spectra of 4-MBA adsorbed on Au nanoworms on ITO from  $10^{-6}$  M ethanolic solution at fifteen randomly selected regions with 1064 nm laser excitation.

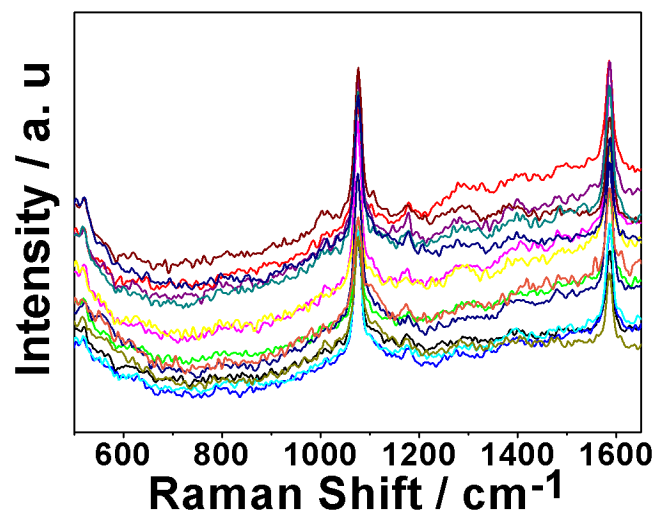

**Figure S9.** Concentration dependant SERS spectra for 4-MBA adsorbed on Au nanoworms on ITO from  $10^{-3}$ ,  $10^{-4}$ ,  $10^{-5}$ ,  $10^{-6}$ ,  $10^{-7}$ ,  $10^{-8}$  and  $10^{-9}$  M (from a to g) ethanolic solutions with 632.8 (i) and 785 (ii) nm laser excitations. The spectra are stacked for clarity.

(i)

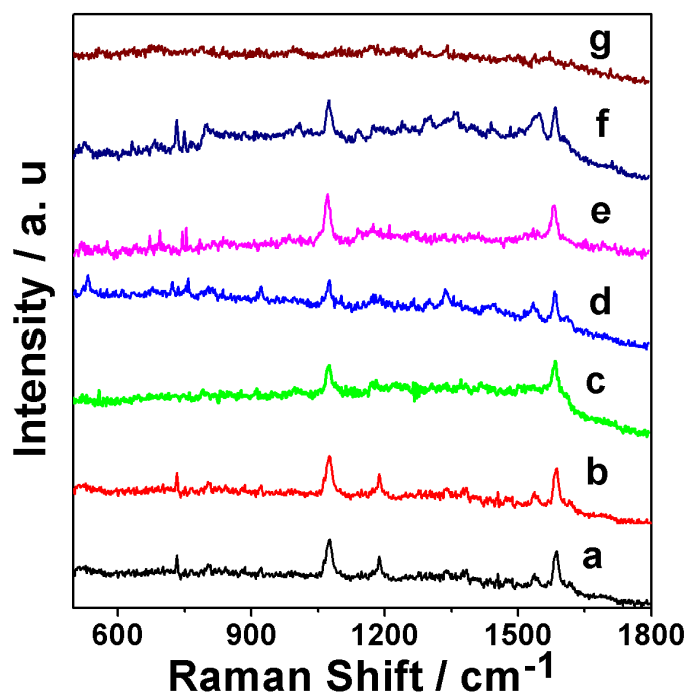

(ii)

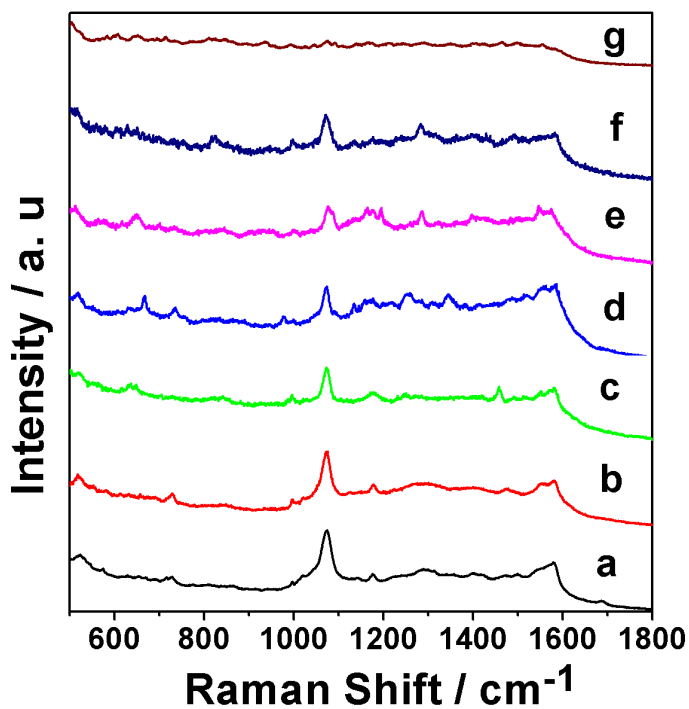

**Figure S10** Concentration dependant SERS spectra for R6G adsorbed on Au nanoworms on ITO from  $10^{-3}$ ,  $10^{-4}$ ,  $10^{-5}$ ,  $10^{-6}$ ,  $10^{-7}$  and  $10^{-8}$  M (from a to f) aqueous solutions with (i) 632.8 and (ii) 1064 nm laser excitations. The spectra are stacked for clarity.

(i)

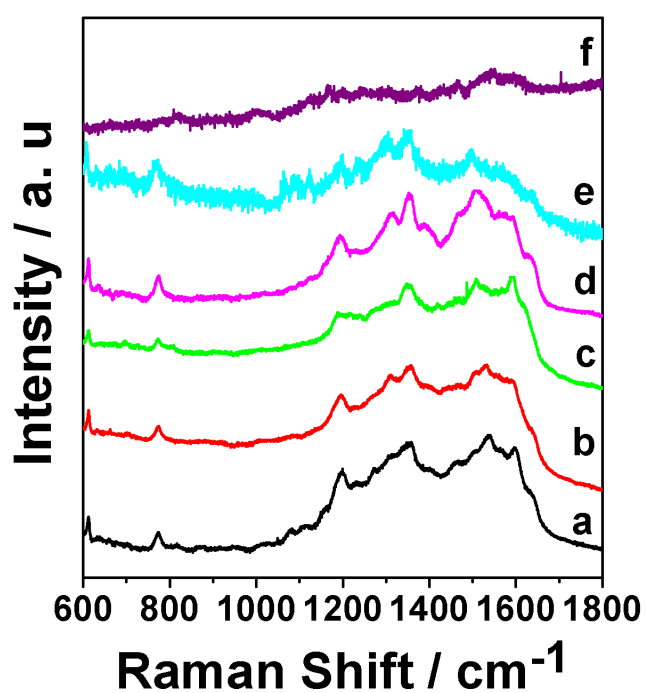

(ii)

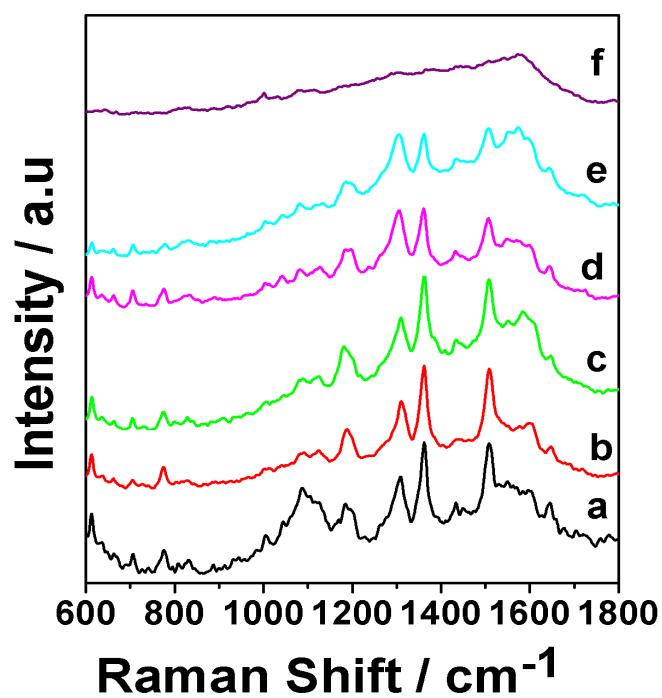

Supplement: c3ra23378b.pdf [file c3ra23378b.pdf]
